# Supplementary material for: Strategic planning for saving the lives of mothers, newborns and children and preventing stillbirths in KwaZulu-Natal province South Africa: modelling using the Lives Saved Tool (LiST)
Source: BMC Public Health. 2016 Jan 19;16:49. doi: 10.1186/s12889-015-2661-x (PMC4719569; doi:10.1186/s12889-015-2661-x)
Supplement: Supplementary file 2 — Sheet 4. Summary of impacts of scaling up LiST interventions to achievable levels from baseline by 2019 and a 0.5 percentage point per annum increase in contraceptive prevalence. Summary of lives saved, life years gained, costs over five years and cost to life years gained ratios for all interventions where contraceptive prevalence increases by 0.5 percentage points per annum. Sheet 5. Summary of impacts of scaling up LiST interventions to achievable levels from baseline by 2019 and a one percentage point per annum increase in contraceptive prevalence. Summary of lives saved, life years gained, costs over five years and cost to life years gained ratios for all interventions where contraceptive prevalence increases by one percentage point per annum. (XLSX 27 kb) [file 12889_2015_2661_MOESM2_ESM.xlsx]

## Sheet: 4. Summary impacts 0.5% contrac
Additional file 2: Sheet 4. Summary of impacts of scaling up LiST interventions to achievable levels from baseline by 2019 and a 0.5 percentage point per annum increase in contraceptive prevalence
	Baseline coverage level in 2014	Coverage level by 2019	Additional lives saved				Total additional lives saved	Incremental costs over 5 years	Incremental Life years gained	Incremental Cost (ZAR) / LY Gained		Life years Gained	Neonate	54
			Stillbirth	Maternal	Neonatal	Child 1-59 months		US$					Stillbirth	54
Contraceptives													Materal	27
0.5 percentage point per annum increase	0.64	0.665	1135	69	448	1004	2656	17694164	141561	124.993			Child	54
Periconceptual
Folic acid supplementation/ fortification	0.9	0.9	43	0	26	0	69	534640	3726	143.489
Safe abortion services	0.2	0.6	0	25	0	0	25	92543	675	137.101
Post abortion case management	0	0.2	0	0	0	0	0	562	0	N/A
Pregnancy									0
Syphilis detection and treatment	0.5	0.85	722	0	20	0	742	1974815	40068	49.2866
Tetanus Toxoid Vaccination	0.6	0.9	0	0	0	0	0	6362	0	N/A
Balanced Energy Supplementation	0	0.2	0	0	2	0	2	2544	108	23.5556
Calcium supplementation	0.5	0.8	0	13	0	0	13	4307880	351	12273.2
Hypertensive disease case management	0.6	0.8	0	9	0	0	9	16574	243	68.2058
Diabetes case management	0.1	0.2	15	0	0	0	15	15776	810	19.4765
MgSO4 - management of pre-eclampsia	0.7	0.9	269	15	0	0	284	3663061	14931	245.333
PMTCT	0.85	0.95	0	0	0	263	263	2033000	14202	143.149
Inter-facility transport	0.1	0.5	0	13	0	0	13	2795994	351	7965.79
Foetal growth restriction detection and management	0.1	0.25	95	0	0	0	95	6596	5130	1.28577
Child Birth									0
Clean birth practices	0.8	0.9	0	5	26	0	31	1094192	1539	710.976
Immediate assessment and Stimulation	0.9	0.98	0	0	23	0	23	90406	1242	72.7907
Labour and Delivery Management	0.93	0.98	728	49	295	0	1072	23755012	56565	419.96
Neonatal resuscitation	0.4	0.95	0	0	329	0	329	33235	17766	1.87071
Antenatal corticosteroids for preterm labor	0.4	0.6	0	0	201	0	201	688837	10854	63.4639
Antibiotics for pPRoM	0.75	0.9	0	3	26	0	29	101033	1485	68.0357
MgSO4 management of eclampsia	0.9	0.95	0	3	0	0	3	830168	81	10249
AMTSL--active management of the third stage of labor	0.9	0.95	0	8	0	0	8	508843	216	2355.75
Induction of labor for pregnancies lasting 41+ weeks	0.2	0.45	52	0	0	0	52	6596	2808	2.349
Breastfeeding
Promotion of Exclusive Breastfeeding	0.8	0.9	0	0	197	421	618	1709578	33372	51.2279
Preventative
Handwashing with soap	0.17	0.4	0	0	0	434	434	704786	23436	30.0728
Clean postnatal practices	0.72	0.95	0	0	89	0	89	5982882	4806	1244.88
Appropriate complementary feeding	0.3	0.5	0	0	0	99	99	16106158	5346	3012.75
Vitamin A supplementation	0.39	0.51	0	0	0	94	94	630624	5076	124.236
Hygienic disposal of childrens stools	0.405	0.5	0	0	0	29	29	460045	1566	293.771
Improved sanitation - utilization of latrines or toilets	0.531	0.576	0	0	0	26	26	Not costed	1404	N/A
Improved water source	0.86	0.94	0	0	0	3	3	Not Costed	162	N/A
Water connection in the home	0.636	0.73	0	0	0	219	219	Not costed	11826	N/A
Vaccines
BCG Vaccination	0.78	0.9	0	0	0	0	0	88567	0	N/A
H Influenza vaccine (as component of hexavalent DTP-HiB-IPV)	0.72	0.9	0	0	0	273	273	463744	14742	31.4573
Pneumococcal Conjugate Vaccine	0.72	0.9	0	0	0	329	329	442664	17766	24.9164
Rotavirus vaccine	0.72	0.9	0	0	0	39	39	330783	2106	157.067
Measles vaccine	0.78	0.9	0	0	0	0	0	243742	0	N/A
Curative after birth
KMC - Kangaroo Mother Care	0.1	0.66	0	0	286	0	286	529956	15444	34.3147
Maternal sepsis case management	0.15	0.6	0	21	0	0	21	2265184	567	3995.03
Case management of severe neonatal infection	0.5	0.8	0	0	528	0	528	1971894	28512	69.1601
ORS - Oral rehydration solution	0.4	0.7	0	0	38	792	830	2058049	44820	45.9181
Antibiotics for the treatment of dysentery	0.58	0.8	0	0	0	42	42	42156	2268	18.5873
Oral antibiotics: case management of pneumonia in children	0.73	0.9	0	0	0	376	376	246404	20304	12.1357
Antiretroviral Therapy (ART)	0.8	0.95	0	0	2	321	323	8225448	17442	471.589
Therapeutic feeding for severe wasting	0	0.5	0	0	0	388	388	12574161	20952	600.141
Treatment for moderate acute malnutrition	0	0.1	0	0	0	8	8	167394	432	387.486
Early detection and treatment of HIV (pregnant women)	0.56	0.75	0	57	0	0	57	638304	1539	414.752
TB Treatment in pregnant women	0.65	0.8	0	32	0	0	32	1737575	864	2011.08
Treatment of injuries for children 1-59 months	0.65	0.75	0	0	0	223	223	Not costed	12042	N/A
TB treatment for children 1-59 months	0.5	0.8	0	0	0	129	129	2258362	6966	324.198
Total			3059	322	2536	5512	11429	120131293	444177	270.458
Average per year			611.8	64.4	507.2	1102.4	2285.8	2.40263e+07	88835.4
Additional Cost per capita per year (population 10.6 million)			2.26663
Additional Cost per capita uninsured population per year (population 9.2 million)			2.61155

## Sheet: 5. Summary impacts 1% contrac
Additional file 2: Sheet 5. Summary of impacts of scaling up LiST interventions to achievable levels from baseline by 2019 and a one percentage point per annum increase in contraceptive prevalence
	Baseline coverage level in 2014	Coverage level by 2019	Additional lives saved				Total additional lives saved	Incremental costs over 5 years	Incremental Life years gained	Incremental Cost (ZAR) / LY Gained		Life years Gained	Neonate	54
			Stillbirth	Maternal	Neonatal	Child 1-59 months		UD$	gained				Stiilbirth	54
Contraceptives													Materal	27
1 percentage point per annum increase	0.64	0.69	2014	137	2272	896	5319	20113685	283527	70.941			Child	54
Periconceptual
Folic acid supplementation/ fortification	0.9	0.93	40	0	24	0	64	448899	3456	129.89
Safe abortion services	0.2	0.6	0	19	0	0	19	65223	513	127.14
Post abortion case management	0	0.2	0	0	0	0	0	-77	0	N/A
Pregnancy									0
Syphilis detection and treatment	0.5	0.85	679	0	19	0	698	1674085	37692	44.4149
Tetanus Toxoid Vaccination	0.6	0.9	0	0	0	0	0	451540	0	N/A
Balanced energy supplementation	0	0.2	0	0	1	0	1	2055	54	38.0556
Calcium supplementation	0.5	0.8	0	13	0	0	13	3548026	351	10108.3
Hypertensive disease case management	0.6	0.8	0	8	0	0	8	13102	216	60.6574
Diabetes case management	0.1	0.2	15	0	0	0	15	13588	810	16.7753
MgSO4 - management of pre-eclampsia	0.7	0.9	247	14	0	0	261	2848222	13716	207.657
PMTCT	0.85	0.95	0	0	0	238	238	562111	12852	43.7372
Inter-facility transport	0.1	0.5	0	11	0	0	11	2569079	297	8650.1
Foetal growth restriction detection and management	0.1	0.25	86	0	0	0	86	5887	4644	1.26766
Child Birth									0
Clean birth practices	0.8	0.9	0	4	23	0	27	768622	1350	569.35
Immediate assessment and Stimulation	0.9	0.98	0	0	20	0	20	65169	1080	60.3417
Labour and Delivery Management	0.93	0.98	675	46	274	0	995	15614613	52488	297.489
Neonatal resuscitation	0.4	0.95	0	0	305	0	305	29364	16470	1.78288
Antenatal corticosteroids for preterm labor	0.4	0.6	0	0	189	0	189	570590	10206	55.9073
Antibiotics for pPRoM	0.75	0.9	0	3	24	0	27	75740	1377	55.0036
MgSO4 management of eclampsia	0.9	0.95	0	1	0	0	1	549310	27	20344.8
AMTSL--active management of the third stage of labor	0.9	0.95	0	6	0	0	6	322147	162	1988.56
Induction of labor for pregnancies lasting 41+ weeks	0.2	0.45	48	0	0	0	48	5887	2592	2.27122
Breastfeeding
Promotion of Exclusive Breastfeeding	0.8	0.9	0	0	186	400	586	1235663	31644	39.0489
Preventative
Handwashing with soap	0.17	0.4	0	0	0	389	389	704786	21006	33.5517
Clean postnatal practices	0.72	0.95	0	0	83	0	83	4819842	4482	1075.38
Appropriate complementary feeding	0.3	0.5	0	0	0	95	95	16016158	5130	3122.06
Vitamin A supplementation	0.39	0.51	0	0	0	91	91	584459	4914	118.938
Hygienic disposal of childrens stools	0.405	0.5	0	0	0	27	27	460045	1458	315.532
Improved sanitation - utilization of latrines or toilets	0.531	0.576	0	0	0	24	24	Not costed	1296	Not costed
Improved water source	0.86	0.94	0	0	0	3	3	Not Costed	162	Not costed
Water connection in the home	0.636	0.73	0	0	0	205	205	Not costed	11070	Not costed
Vaccines
BCG vaccination	0.78	0.9	0	0	0	0	0	39762	0	N/A
H Influenza vaccine (as component of hexavalent DTP-HiB-IPV)	0.72	0.9	0	0	0	233	233	-125395	12582	-9.96622
Pneumococcal Conjugate Vaccine	0.72	0.9	0	0	0	315	315	26184	17010	1.53933
Rotavirus vaccine	0.72	0.9	0	0	0	34	34	285	1836	0.155229
Measles vaccine	0.78	0.9	0	0	0	0	0	150699	0	N/A
Curative after birth
KMC - Kangaroo Mother Care	0.1	0.66	0	0	265	0	265	492395	14310	34.4092
Maternal sepsis case management	0.15	0.6	0	21	0	0	21	2102761	567	3708.57
Case management of severe neonatal infection	0.5	0.8	0	0	498	0	498	1815119	26892	67.4966
ORS - Oral rehydration solution	0.4	0.7	0	0	36	757	793	1877691	42822	43.8487
Antibiotics for the treatment of dysentery	0.58	0.8	0	0	0	39	39	34802	2106	16.5252
Oral antibiotics: case management of pneumonia in children	0.73	0.9	0	0	0	363	363	214685	19602	10.9522
Antiretroviral Therapy (ART)	0.8	0.95	0	0	2	283	285	7884495	15390	512.313
Therapeutic feeding for severe wasting	0	0.5	0	0	0	370	370	11864896	19980	593.839
Treatment for moderate acute malnutrition	0	0.1	0	0	0	7	7	160059	378	423.437
Early detection and treatment of HIV (pregnant women)	0.56	0.75	0	47	0	0	47	136701	1269	107.723
TB Treatment in pregnant women	0.65	0.8	0	20	0	0	20	427742	540	792.115
Treatment of injuries for children 1-59 months	0.65	0.75	0	0	0	215	215	Not costed	11610	#VALUE!
TB treatment for children 1-59 months	0.5	0.8	0	0	0	115	115	1518290	6210	244.491
Total			3804	350	4221	5099	13474	102758991	413343	248605
Average per year			760.8	70	844.2	1019.8	2694.8	2.05518e+07	82668.6
Additional Cost per capita per year (population 10.6 million)			1.93885
Additional Cost per capita uninsured population per year (population 9.2 million)			2.23389
